# Supplementary material
Source: ML conference proceedings conference paper supplement (https://aclanthology.org/D19-1564)
Supplement: Attachment [file ArgumentQuality_Sup_Mat_EMNLP2019.pdf › ArgumentQuality_Sup_Mat_EMNLP2019.pdf]

# Supplementary Material

## 1 Data Collection

In Table 1 we present the number of arguments of each motion in each of the datasets we release. Note that because we are filtering annotators as part of the generation of the *IBMRank* dataset, it is possible that the determined stance (and motion) of certain arguments has changed as well.

| Motion                                                    | #IBM-ArgQ-Pairs |      | #IBM-ArgQ-Args |      |
|-----------------------------------------------------------|-----------------|------|----------------|------|
|                                                           | 14k             | 9.1k | 6.3k           | 5.3k |
| Flu vaccination should be mandatory                       | 591             | 384  | 204            | 121  |
| Flu vaccination should not be mandatory                   | 574             | 347  | 174            | 111  |
| Gambling should be banned                                 | 399             | 244  | 342            | 329  |
| Gambling should not be banned                             | 391             | 259  | 382            | 371  |
| Online shopping brings more good than harm                | 219             | 135  | 215            | 207  |
| Online shopping brings more harm than good                | 249             | 143  | 198            | 189  |
| Social media brings more good than harm                   | 1982            | 1301 | 686            | 615  |
| Social media brings more harm than good                   | 2000            | 1286 | 879            | 831  |
| We should abandon cryptocurrency                          | 542             | 335  | 160            | 74   |
| We should adopt cryptocurrency                            | 573             | 384  | 172            | 87   |
| We should abandon vegetarianism                           | 748             | 516  | 179            | 104  |
| We should adopt vegetarianism                             | 805             | 557  | 221            | 142  |
| We should allow the sale of violent video games to minors | 408             | 243  | 244            | 190  |
| We should ban the sale of violent video games to minors   | 422             | 241  | 275            | 223  |
| We should ban fossil fuels                                | 187             | 118  | 146            | 143  |
| We should not ban fossil fuels                            | 193             | 145  | 116            | 119  |
| We should ban doping in sport                             | 625             | 386  | 215            | 155  |
| We should legalize doping in sport                        | 613             | 351  | 212            | 146  |
| We should limit autonomous cars                           | 556             | 362  | 313            | 277  |
| We should promote autonomous cars                         | 1114            | 855  | 480            | 416  |
| We should discourage information privacy laws             | 115             | 77   | 93             | 94   |
| We should support information privacy laws                | 697             | 456  | 355            | 354  |

Table 1: Motion list and number of arguments in released datasets.

## 2 Experiments

| Test motion                                                     | Train size | Test size | Arg-Classifier |      | GPPL |      |
|-----------------------------------------------------------------|------------|-----------|----------------|------|------|------|
|                                                                 |            |           | Acc.           | AUC  | Acc. | AUC  |
| Flu vaccination should be mandatory (PRO)                       | 8741       | 384       | 0.74           | 0.81 | 0.70 | 0.80 |
| Flu vaccination should not be mandatory (CON)                   | 8778       | 347       | 0.67           | 0.71 | 0.58 | 0.62 |
| Gambling should be banned (PRO)                                 | 8881       | 244       | 0.86           | 0.92 | 0.79 | 0.88 |
| Gambling should not be banned (CON)                             | 8866       | 259       | 0.80           | 0.88 | 0.71 | 0.77 |
| Online shopping brings more good than harm (CON)                | 8990       | 135       | 0.76           | 0.82 | 0.64 | 0.68 |
| Online shopping brings more harm than good (PRO)                | 8982       | 143       | 0.83           | 0.88 | 0.73 | 0.81 |
| Social media brings MORE GOOD than harm                         | 7824       | 1301      | 0.81           | 0.88 | 0.71 | 0.79 |
| Social media brings MORE HARM than good                         | 7839       | 1286      | 0.82           | 0.88 | 0.74 | 0.81 |
| We should abandon cryptocurrency (CON)                          | 8790       | 335       | 0.83           | 0.91 | 0.76 | 0.83 |
| We should adopt cryptocurrency (PRO)                            | 8741       | 384       | 0.85           | 0.93 | 0.78 | 0.86 |
| We should abandon vegetarianism (CON)                           | 8609       | 516       | 0.86           | 0.92 | 0.71 | 0.80 |
| We should adopt vegetarianism (PRO)                             | 8568       | 557       | 0.81           | 0.87 | 0.69 | 0.76 |
| We should allow the sale of violent video games to minors (CON) | 8882       | 243       | 0.81           | 0.89 | 0.73 | 0.80 |
| We should ban the sale of violent video games to minors (PRO)   | 8884       | 241       | 0.74           | 0.78 | 0.67 | 0.72 |
| We should ban fossil fuels (PRO)                                | 9007       | 118       | 0.69           | 0.80 | 0.70 | 0.78 |
| We should not ban fossil fuels (CON)                            | 8980       | 145       | 0.77           | 0.82 | 0.58 | 0.59 |
| We should ban doping in sport (CON)                             | 8739       | 386       | 0.76           | 0.81 | 0.68 | 0.74 |
| We should legalize doping in sport (PRO)                        | 8774       | 351       | 0.81           | 0.87 | 0.79 | 0.87 |
| We should limit autonomous cars (PRO)                           | 8763       | 362       | 0.77           | 0.81 | 0.70 | 0.75 |
| We should promote autonomous cars (CON)                         | 8270       | 855       | 0.80           | 0.86 | 0.71 | 0.77 |
| We should discourage information privacy laws (CON)             | 9048       | 77        | 0.81           | 0.88 | 0.82 | 0.86 |
| We should support information privacy laws (PRO)                | 8669       | 456       | 0.82           | 0.87 | 0.70 | 0.79 |

Table 2: The size of the training set and test set for each of the folds on the *IBMPairs* data, and the accuracy and roc auc of Arg-Classifier and GPPL.

| Test motion                                                     | Train size | Test size | Arg-Ranker |        |
|-----------------------------------------------------------------|------------|-----------|------------|--------|
|                                                                 |            |           | $r$        | $\rho$ |
| Flu vaccination should be mandatory (PRO)                       | 5356       | 121       | 0.39       | 0.37   |
| Flu vaccination should not be mandatory (CON)                   | 5365       | 112       | 0.25       | 0.27   |
| Gambling should be banned (PRO)                                 | 5146       | 331       | 0.47       | 0.49   |
| Gambling should not be banned (CON)                             | 5087       | 390       | 0.41       | 0.38   |
| Online shopping brings more good than harm (CON)                | 5243       | 234       | 0.63       | 0.56   |
| Online shopping brings more harm than good (PRO)                | 5287       | 190       | 0.57       | 0.53   |
| Social media brings more good than harm                         | 4788       | 689       | 0.53       | 0.53   |
| Social media brings more harm than good                         | 4645       | 832       | 0.33       | 0.32   |
| We should abandon cryptocurrency (CON)                          | 5402       | 75        | 0.59       | 0.47   |
| We should adopt cryptocurrency (PRO)                            | 5390       | 87        | 0.30       | 0.33   |
| We should abandon vegetarianism (CON)                           | 5370       | 107       | 0.54       | 0.46   |
| We should adopt vegetarianism (PRO)                             | 5335       | 142       | 0.34       | 0.30   |
| We should allow the sale of violent video games to minors (CON) | 5282       | 195       | 0.36       | 0.38   |
| We should ban the sale of violent video games to minors (PRO)   | 5253       | 224       | 0.35       | 0.32   |
| We should ban fossil fuels (PRO)                                | 5334       | 143       | 0.48       | 0.44   |
| We should not ban fossil fuels (CON)                            | 5356       | 121       | 0.52       | 0.46   |
| We should ban doping in sport (CON)                             | 5319       | 158       | 0.35       | 0.32   |
| We should legalize doping in sport (PRO)                        | 5331       | 146       | 0.28       | 0.24   |
| We should limit autonomous cars (PRO)                           | 5198       | 279       | 0.34       | 0.34   |
| We should promote autonomous cars (CON)                         | 5047       | 430       | 0.52       | 0.50   |
| We should discourage information privacy laws (CON)             | 5363       | 114       | 0.40       | 0.38   |
| We should support information privacy laws (PRO)                | 5120       | 357       | 0.31       | 0.32   |

Table 3: The size of the training set and test set for each of the folds on the *IBMRank* data, and the Pearson’s ( $r$ ) and Spearman’s ( $\rho$ ) correlation of Arg-Ranker.
